# Supplementary material for: Isolation and hypoglycemic effects of water extracts from mulberry leaves in Northeast China
Source: Royal Society of Chemistry journal article supplement (doi:10.1039/d0fo00012d), 2020-01-01
Supplement: d0fo00012d1.pdf [file d0fo00012d1.pdf]

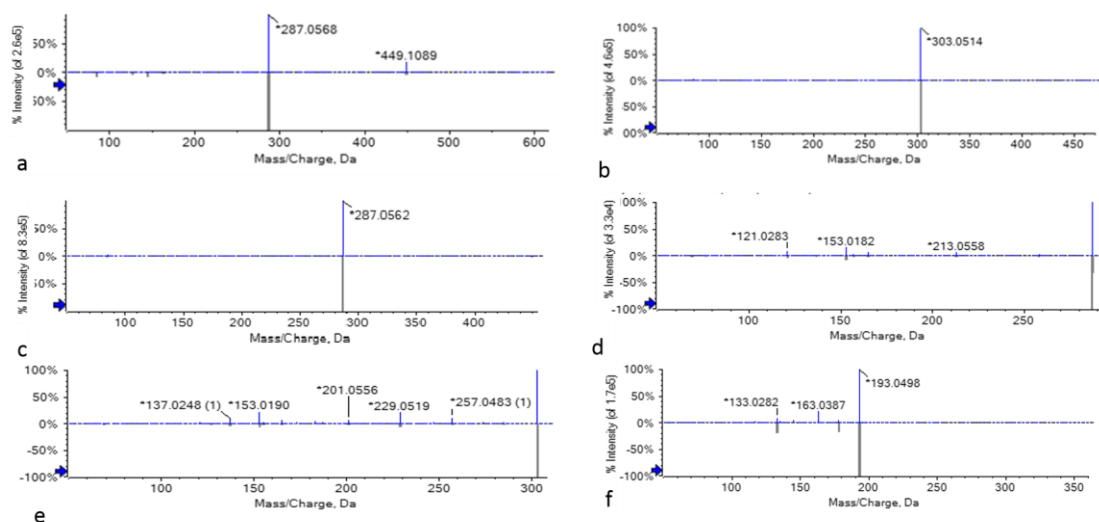

Figure S1 TOF MS analysis of flavonoids in the aqueous extract of mulberry leaves including rutin (a), isoquercetin (b), astragalin (c), kaempferol (d), quercetin (e), and scopolamine (f).
